# Supplementary material for: miR-96 and miR-183 differentially regulate neonatal and adult postinfarct neovascularization
Source: PubMed Central journal article supplement (PMC7453899; doi:10.1172/jci.insight.134888), 2020-07-23
Supplement: jciinsight-5-134888-s041.pdf [file jciinsight-5-134888-s041.pdf]

## Supplemental Material

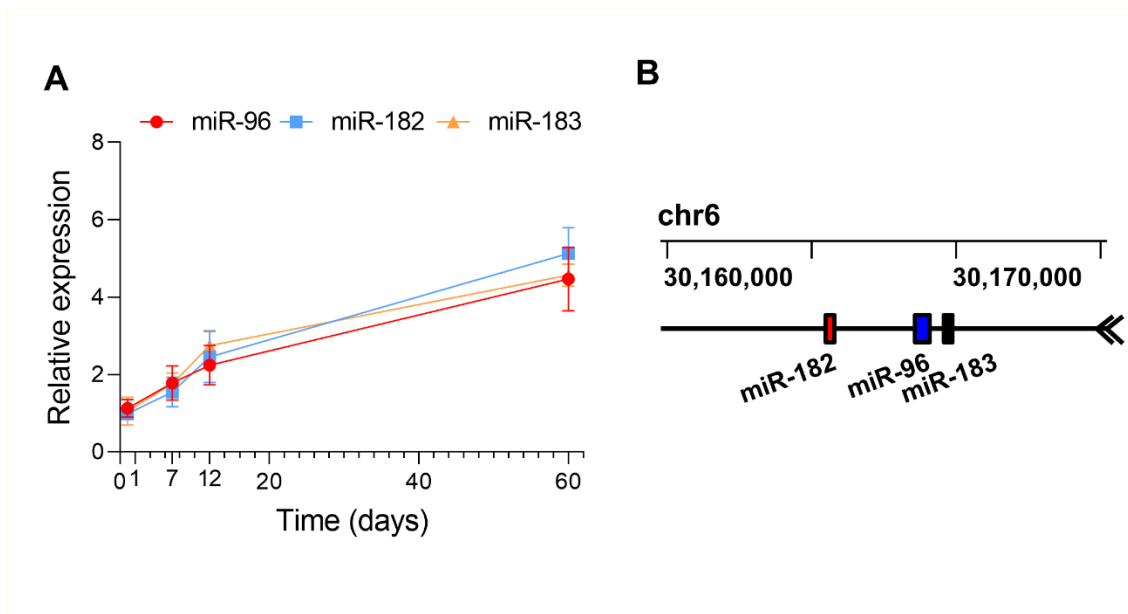

**Supplementary Figure 1. MiR expression profiling in neonatal and adult MCECs.** (A) The expression of all members of the miR-183 cluster gradually increases in MCECs at different time points across the regenerative window (P1, P7, P12 and 8 weeks). (B) Genomic structure of the miR-183 cluster in the mouse.

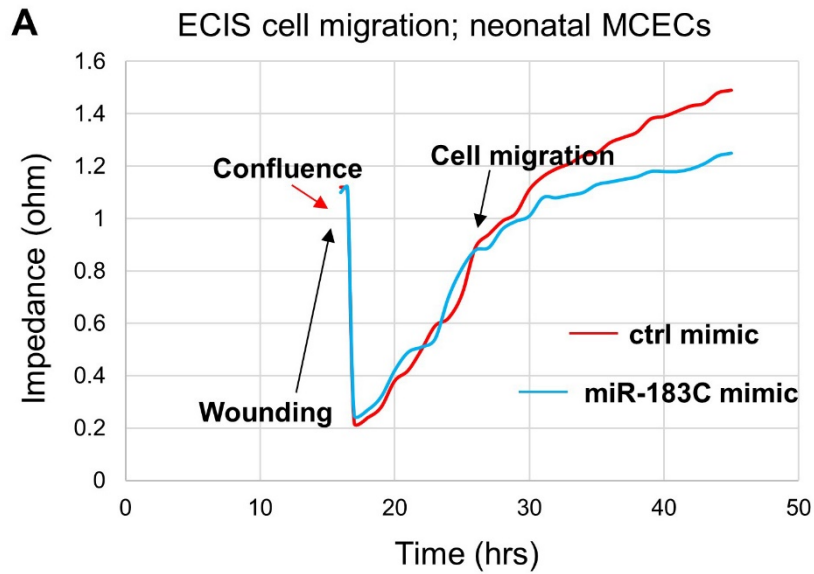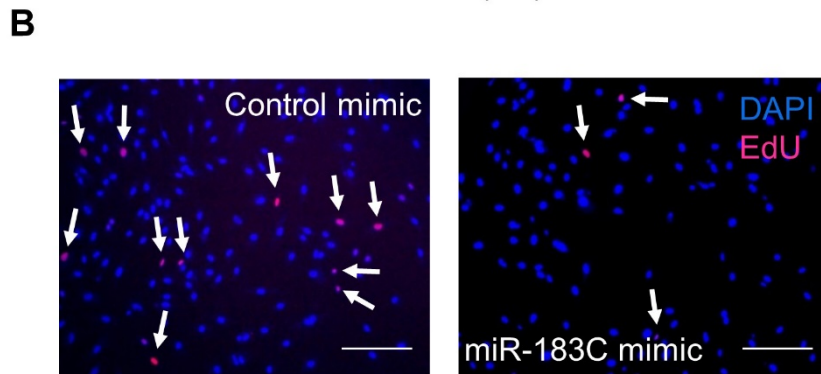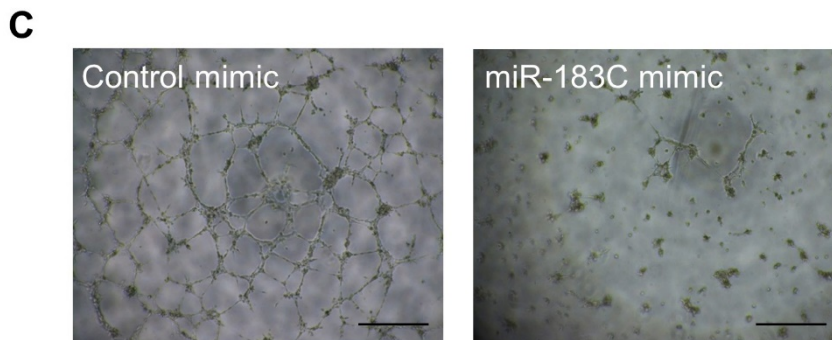

**Supplementary Figure 2. Effects of miR-183 cluster overexpression in neonatal MCECs.** (A) Graphs show that mimic-mediated overexpression of the miR-183 cluster does not affect migration of neonatal MCECs (red line) compared to neonatal MCECs transfected with control mimic (blue line). (B) Representative microphotographs showing that the number of EdU<sup>+</sup> proliferating cells decreases after overexpression of the miR-183 cluster in neonatal MCECs. EdU<sup>+</sup> cells are shown in red and indicated by arrows, DAPI<sup>+</sup> nuclei in blue. Scale bar = 50 $\mu$ m. (C) Representative microphotographs showing that overexpression of the miR-183 cluster in neonatal MCECs prevents the formation of tube-like structures. Scale bar = 50 $\mu$ m.

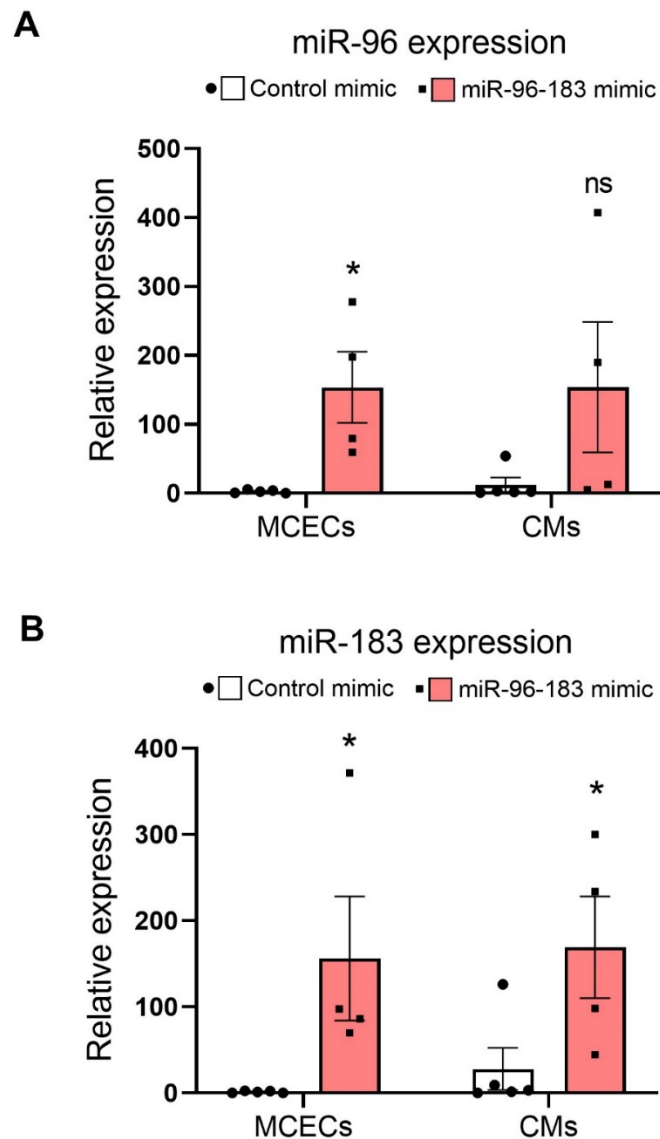

**Supplementary Figure 3. miR-96 and miR-183 mimics intra-myocardial injections increases their respective expression levels in MCECs and cardiomyocytes.** (A) Real-time PCR showing expression levels of miR-96 at day 1 following MI in freshly isolated MCECs and cardiomyocytes (CMs). (B) Real-time PCR showing expression levels of miR-183 at day 1 following MI in freshly isolated MCECs and CMs.  $n = 5$  for control mimic and  $n = 4$  for miR96 and miR183 injected groups. \* $p < 0.05$  vs control anti-miR. (Student's  $t$ -test). Data are expressed as mean  $\pm$  SEM.

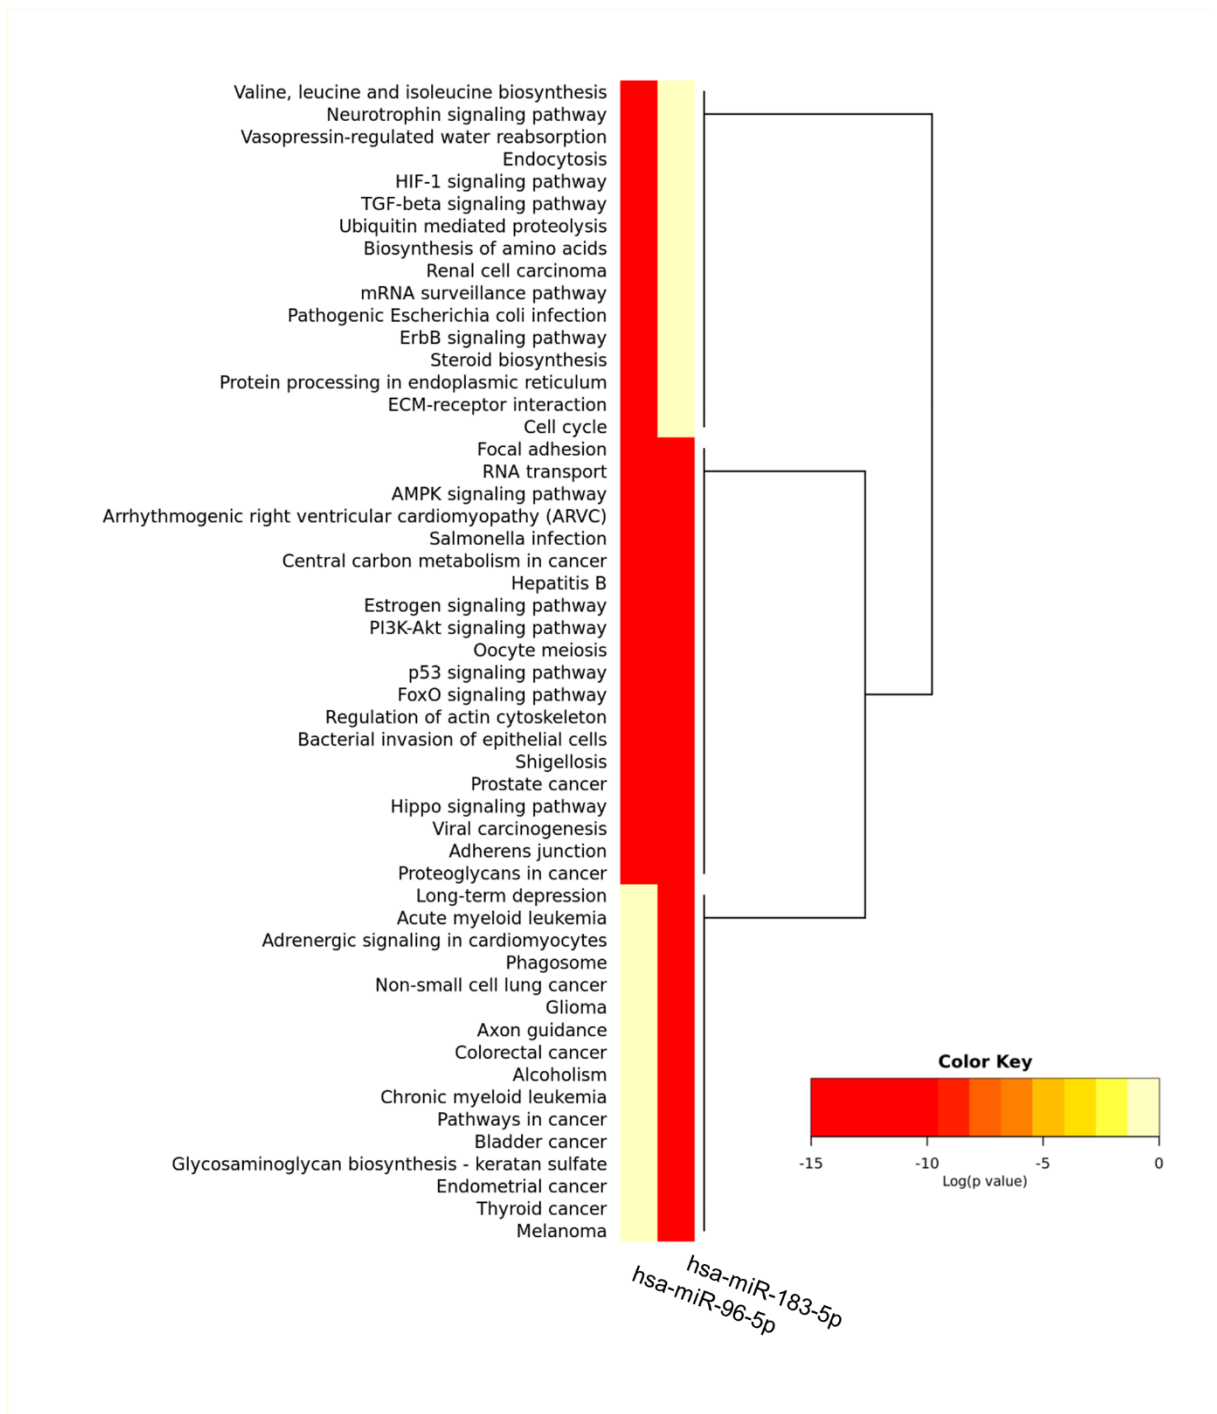

**Supplementary Figure 4. MiR pathway analysis.** miR pathway analysis was performed using DIANA-mirPath webserver. Target genes were identified by Tarbase and allocated to KEGG pathways. Common pathways for miR-96 and miR-183 are shown in red.

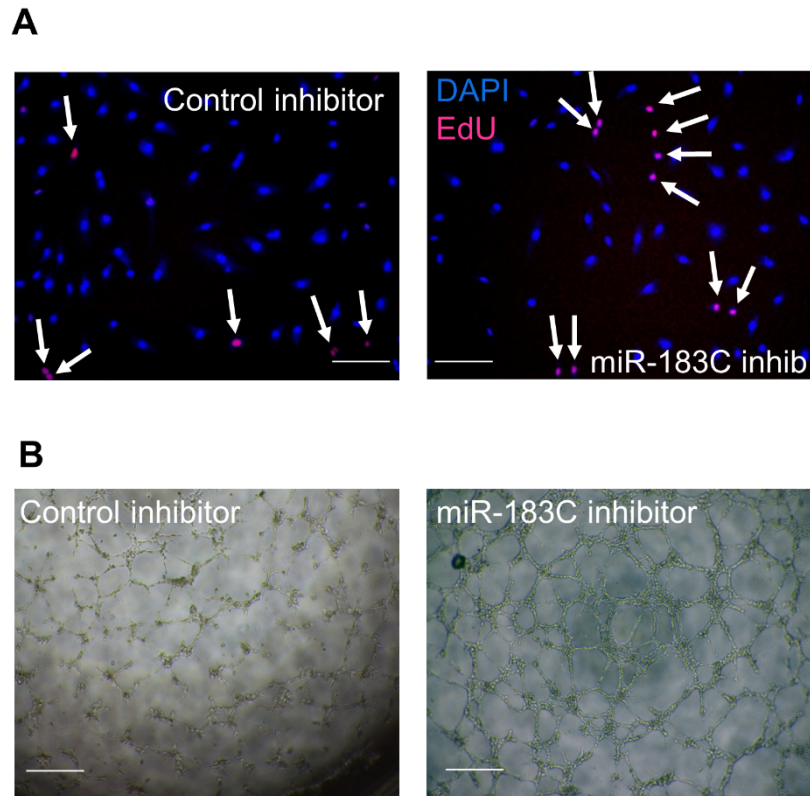

**Supplementary Figure 5. Effects of miR-183 cluster inhibition in adult MCECs.** (A) Representative microphotographs showing the increased number of EdU+ proliferating cells after inhibition of the miR-183 cluster in adult MCECs. EdU<sup>+</sup> cells are shown in red and indicated by arrows, DAPI<sup>+</sup> nuclei in blue. Scale bar = 50 $\mu$ m. (B) Representative microphotographs showing that inhibition of the miR-183 cluster in adult MCECs induces the formation of tube-like structures. Scale bar = 50 $\mu$ m.

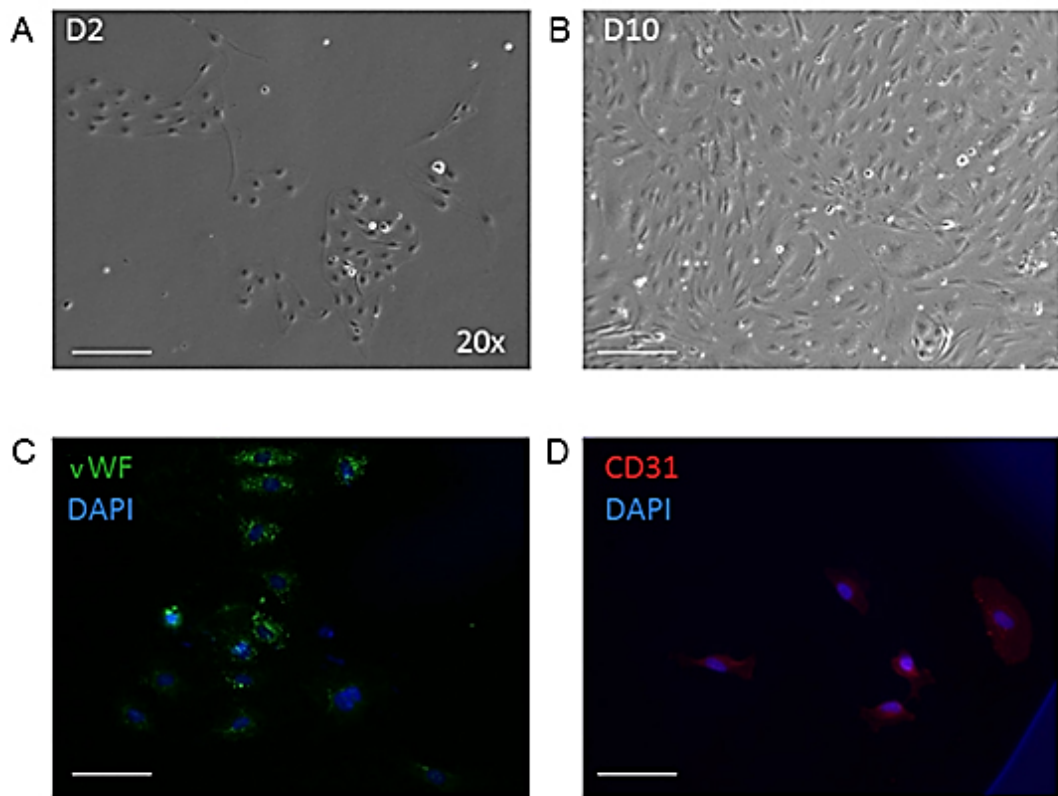

**Supplementary Figure 6. Isolation, culture and characterisation of human cardiac ECs.** Human cardiac ECs (HCECs) were isolated from the heart of neonatal subjects in collaboration with Prof. Massimo Caputo, University of Bristol. HCECs at 2 days (A) and 10 days (B) of culture. Characterisation of HCECs in culture using the endothelial markers Von Willebrand Factor (vWF, in green; C) and CD31 (in red, D). DAPI<sup>+</sup> nuclei are depicted in blue. Scale bar = 50 $\mu$ m

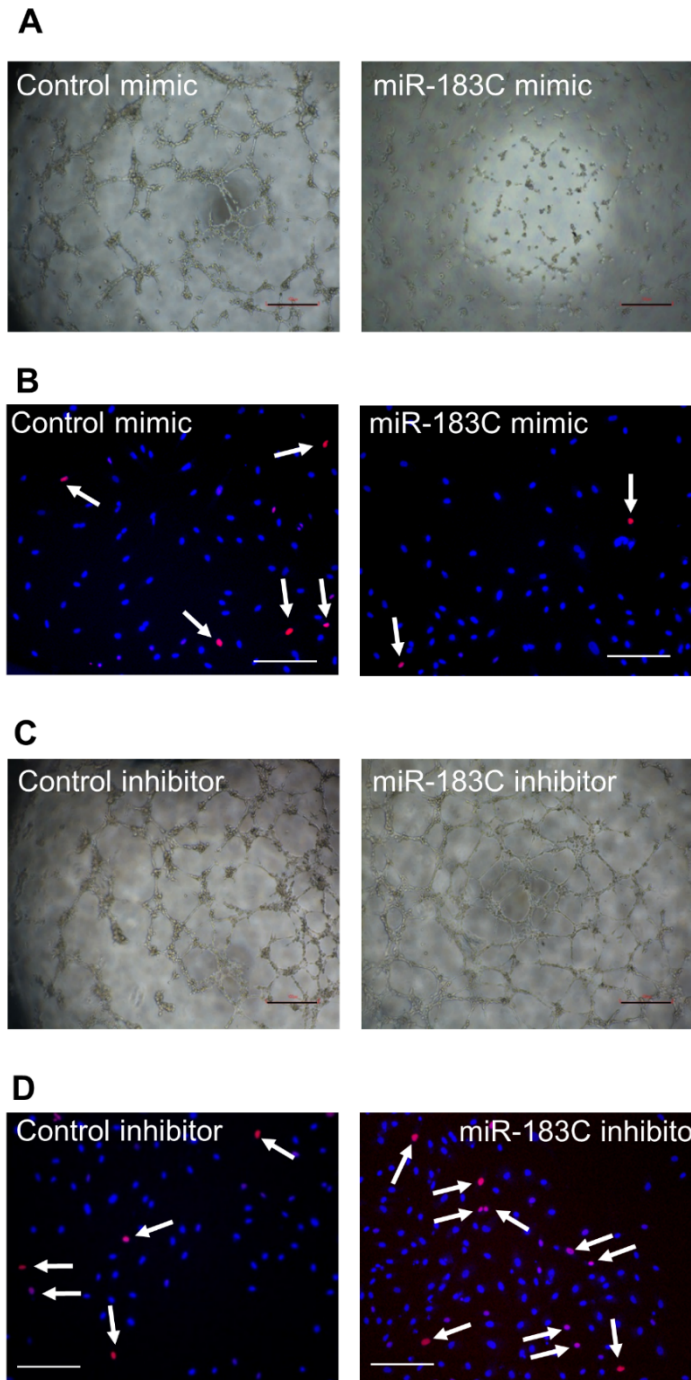

**Supplementary Figure 7. Effects of miR-183 cluster inhibition and overexpression in HCECs.** (A) Representative microphotographs showing that overexpression of the miR-183 cluster in HCECs reduces the formation of tube-like structures and (B) the number of EdU<sup>+</sup> proliferating cells. (C) Representative microphotographs showing that inhibition of the miR-183 cluster in HCECs improves the formation of tube-like structures and (D) increases the number of EdU<sup>+</sup> proliferating cells. EdU<sup>+</sup> cells are shown in red and indicated by arrows, DAPI<sup>+</sup> nuclei in blue. Scale bar = 50 $\mu$ m.

**Table 1**

|                                     | Baseline   |               | 14 days      |               |
|-------------------------------------|------------|---------------|--------------|---------------|
|                                     | Wild type  | miR-96-183 KO | Wild type    | miR-96-183 KO |
| <b>Ejection fraction (%)</b>        | 63.98±2.47 | 60.61±9.34    | 26.27±3.12   | 22.81±3.06    |
| <b>Fractional shortening (%)</b>    | 34.55±1.79 | 32.33±5.32    | 14.80±1.41   | 10.61±1.67    |
| <b>Cardiac output (ml/min)</b>      | 21.86±1.79 | 16.93±2.97    | 20.22±2.4    | 15.40±1.52    |
| <b>Stroke volume (µl)</b>           | 42.39±3.22 | 34.38±5.8     | 36.56±4.54   | 28.43±2.71    |
| <b>ED LV internal diameter (mm)</b> | 3.91±0.15  | 3.71±0.54     | 5.50±0.24    | 5.30±0.21     |
| <b>ES LV internal diameter (mm)</b> | 2.57±0.15  | 2.53±0.29     | 4.70±0.23    | 4.77±0.25     |
| <b>ED LV chamber volume (µl)</b>    | 67.38±6.23 | 59.61±9.91    | 140.68±12.05 | 137.01±11.15  |
| <b>ES LV chamber volume (µl)</b>    | 24.99±3.51 | 24.36±5.32    | 104.12±10.57 | 108.58±11.60  |
| <b>Fibrosis (%)</b>                 | -          | -             | 38.31±6.84   | 35.83±11.73   |

**Supplementary Table 1. Analysis of cardiac function in Wild type and miR-96-183 KO mice at baseline and after 14 days from MI.**

ED: end diastolic; ES: end systolic; LV left ventricle. Data are expressed as mean±SEM. Wild Type n=10; miR-96-183 KO n=13.



**Table 2**

| <b>Age<br/>(years)</b> | <b>Gender</b> | <b>Pathology</b>                    | <b>Surgical procedure</b>              |
|------------------------|---------------|-------------------------------------|----------------------------------------|
| 0.8                    | M             | Single ventricle                    | Glen shunt                             |
| 1                      | M             | TOF                                 | TOF repair                             |
| 2                      | F             | Multiple VSD                        | VSD closure / PA reconstruction        |
| 5                      | M             | TOF                                 | Rastelli procedure (RV)                |
| 6                      | F             | Bicuspid aortic valve               | Ross operation                         |
| 7                      | F             | Mixed aortic valve disease          | Ross operation (RV)                    |
| 8                      | M             | LVOT /RVOT obstruction              | LVOT / RVOT reconstruction             |
| 10                     | M             | TOF                                 | Redo PVR                               |
| 12                     | F             | TOF                                 | Redo PVR                               |
| 21                     | F             | TOF                                 | Redo PVR                               |
| 57                     | M             | TOF                                 | Redo PVR                               |
| 61                     | M             | ASD + mitral valve<br>regurgitation | Mitral valve repair and<br>ASD closure |

**Supplementary Table 2. Patients characteristics.** Age, gender, pathological conditions and surgical procedures performed on human subjects. TOF: Tetralogy of Fallot; VSD: Ventricular Septal Defects; LVOT: Left Ventricular Outflow Tract; RVOT: Right Ventricular Outflow Tract; ASD: Atrial Septal Defect; PA: Pulmonary Artery; PVR: Pulmonary Valve Replacement.
